AUGUST 2022 | VOLUME 179 | NUMBER 8

# The American Journal of Psychiatry

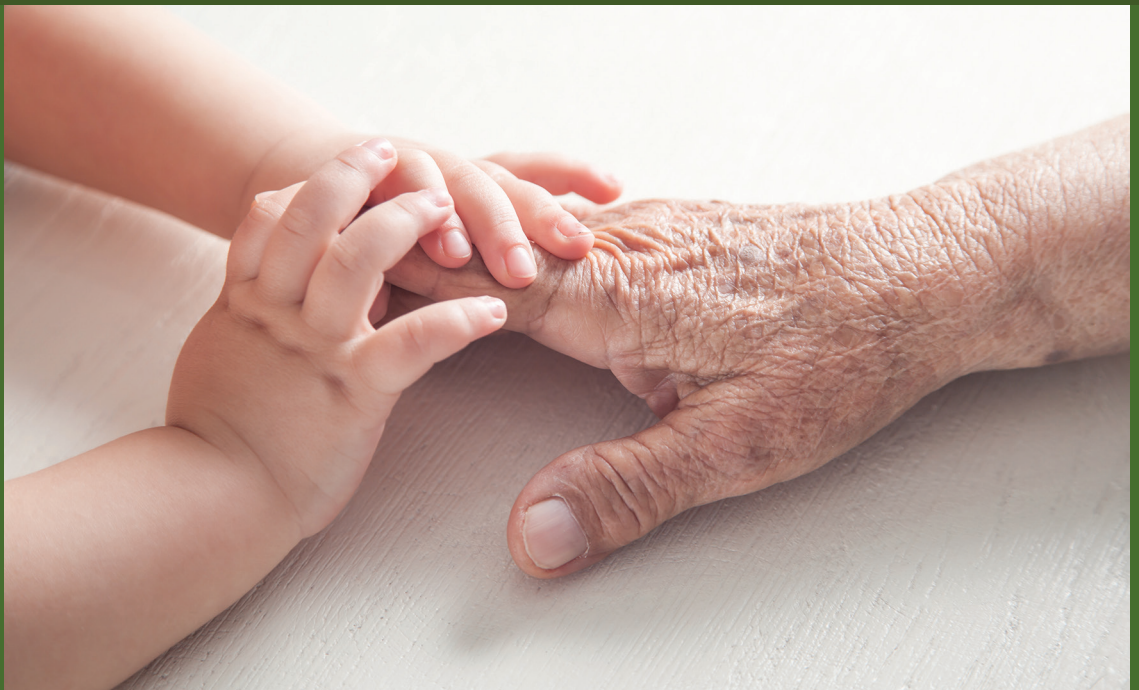

Evaluation of Antipsychotic Reduction Efforts in Patients With  
Dementia in Veterans Health Administration Nursing Homes

Mortality Among Parkinson's Disease Patients Treated  
With Pimavanserin or Atypical Antipsychotics

Subcortical Brain Development in Autism  
and Fragile X Syndrome

Infant Visual Brain Development and Inherited  
Genetic Liability in Autism

AMERICAN  
**PSYCHIATRIC**  
ASSOCIATION 

[ajp.psychiatryonline.org](http://ajp.psychiatryonline.org)
