# Considering Going Deep with TMS for Your Practice? Here is Why You Should Choose MagVenture®

Are you a mental health professional who is considering TMS treatment options for your Practice? MagVenture provides proven solutions to treat major depressive disorder as well as OCD, solutions that help practitioners improve patients' lives and benefit their practice as well. You have choices when it comes to TMS systems. So why choose us?

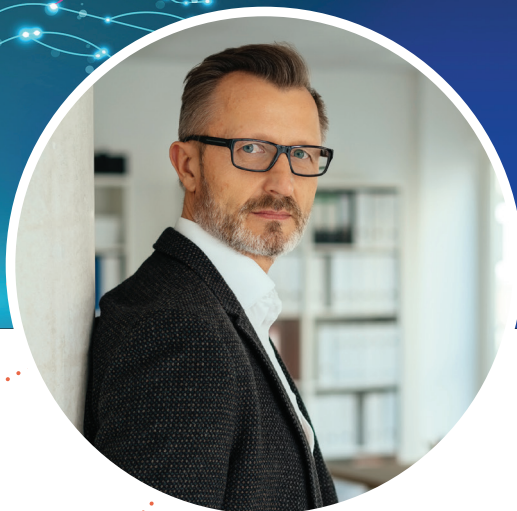

## Ease of Use.

Switch coils easily and quickly, with no tools.

## Value.

No "pay-per-use" fees and low cost of operation. Start to recoup your investment immediately.

## Specificity.

MagVenture systems exhibit a 6.4-fold lower seizure rate compared to systems with helmet-style coils.<sup>3</sup>

## Flexibility.

The MV system is modular and grows with you. Our liquid-cooled coils allow you to treat patients back-to-back all day long.

## Reputation and Efficacy.

More of our machines are installed globally than any other manufacturer. The foremost TMS experts and researchers use MagVenture systems.

## Patient Satisfaction.

Our systems are quiet<sup>1</sup>, comfortable<sup>2</sup>, and less confining for the patient.

## Support.

We have teams in three US locations to support you.

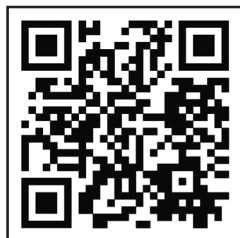

Find out what hundreds of practitioners already know about the benefits of working with MagVenture. Contact us today and let's talk about how we can help you get your patients well while providing value for your practice on day 1. **Go deep with MagVenture.**

MagVenture.com

**MagVenture** TMS Therapy  
Stimulating mental health.

1. S.C. Dhamne et al., *Brain Stimulation* (2014); 7(3): 432-434  
2. A.V. Peterchev et al. *Brain Stimulation* (2017); 10(1): 99-105  
3. J.J. Taylor, et al., *Brain Stimulation* 14 (2021) 965e973

PERMANENTE MEDICINE®

Physician led. Evidence based.  
Culturally driven. Technology enabled.

Interested in fulfilling the promise of medicine?

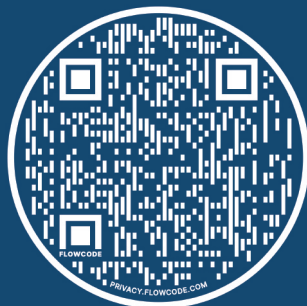

Scan here to take  
the next step in your  
Psychiatry career.

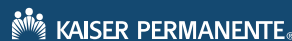

permanente.org  
We are an EOE/AA/M/F/D/V Employer

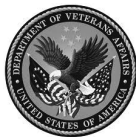

### The Louisville VA Medical Center is recruiting for a psychiatrist Section Chief, Acute Care Mental Health

The Louisville VAMC is recruiting for a Chief of Acute Mental Health. This Psychiatrist/Section Chief position provides leadership and oversight for the effective provision of acute mental health services in the inpatient and Emergency Department settings at this 1b level tertiary care VA health care system.

The incumbent serves as the psychiatry discipline lead for the facility Mental Health Service, and oversees the professional practice standards and privileges for mental health physicians. The incumbent will also maintain clinical privileges and provide direct patient care. The successful candidate will demonstrate strong experience in quality improvement, clinical operations, business acumen, academic affiliations, and supervisory regulations.

The RRVAMC is affiliated with the University of Louisville and applicants may apply for faculty appointment commensurate with their experience. A comprehensive rewards package commensurate with experience is offered with this position and may include Pay for Performance, Recruitment Incentives, Educational Debt Reduction Program and/or Ad Hoc Telework opportunities for eligible candidates - VHA Physician Total Rewards. Louisville, Kentucky

#### Interested Applicants:

Please apply and submit CV online at [www.usajobs.gov](http://www.usajobs.gov)  
Physician - Supervisory Psychiatrist, Louisville Kentucky.

## Seeking Value

### Balancing Cost and Quality in Psychiatric Care

Edited by Wesley E. Sowers, M.D.,  
and Jules M. Ranz, M.D. Group for  
the Advancement of Psychiatry

### *Seeking Value: Balancing Cost and Quality in Psychiatric*

*Care*, a comprehensive volume by the Group for the Advancement of Psychiatry's Mental Health Services Committee, examines the myriad factors that have led to the current state of health care in the United States—starting with an analysis of the meaning and history of value measurement—but it does not stop there. It offers a holistic vision for health care reform, one in which psychiatric professionals play a pivotal role.

2021 • 643 pages • ISBN 978-0-87318-225-6  
Hardcover • \$85.00 • Item #7225

2021 • 643 pages • ISBN 978-0-87318-226-3  
eBook • \$68.00 • Item #7226

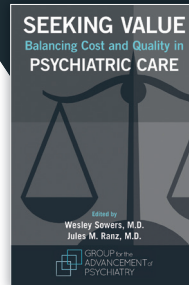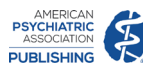

ORDER @ [www.appi.org](http://www.appi.org) | Email: [appi@psych.org](mailto:appi@psych.org) | Toll Free: 1-800-368-5777  
20% Discount for American Psychiatric Association Members  
25% Discount for APA Resident-Fellow Members

Follow us on and

AH2232

# THE AMERICAN PSYCHIATRIC ASSOCIATION

800 Maine Avenue, S.W., Suite 900, Washington, D.C. 20024

(888) 357-7924 (toll-free inside the U.S. and Canada)

web site: [www.psychiatry.org](http://www.psychiatry.org) • e-mail: [apa@psych.org](mailto:apa@psych.org)

## Chairpersons of Councils, Committees, and Task Forces

### Standing Committees

|                             |                              |
|-----------------------------|------------------------------|
| <b>Bylaws</b>               | Edward R. Herman, J.D., M.D. |
| <b>Elections</b>            | Josepha A. Cheong, M.D.      |
| <b>Ethics</b>               | Charles Dike, M.D.           |
| <b>Finance and Budget</b>   | Ann T. Sullivan, M.D.        |
| <i>Audit</i>                | Richard F. Summers, M.D.     |
| <i>Investment Oversight</i> | Steven S. Sharfstein, M.D.   |
| <b>Joint Reference</b>      | Petros Levounis, M.D., M.A.  |
| <b>Membership</b>           | Gail Robinson, M.D.          |
| <b>Nominating</b>           | Vivian B. Pender, M.D.       |
| <b>Tellers</b>              | Mariam F. Aboukar, D.O.      |

### Non-Standing Committee

|                             |                               |
|-----------------------------|-------------------------------|
| <b>Conflict of Interest</b> | Sandra M. DeJong, M.D., M.Sc. |
|-----------------------------|-------------------------------|

### Councils

#### Council on Addiction Psychiatry

Smita Das, M.D., M.P.H., Ph.D.

#### Council on Advocacy and Government Relations

Katherine G. Kennedy, M.D.

*Advocacy and Litigation Funding*

Patrick Aquino, M.D.

#### Council on Children, Adolescents, and Their Families

Anish R. Dube, M.D., M.P.H.

*Women's Mental Health*

Ludmila B. De Faria, M.D.

#### Council on Communications

Howard Liu, M.D., M.B.A.

#### Council on Consultation-Liaison Psychiatry

Maria L. Tiamson-Kassab, M.D.

#### Council on Geriatric Psychiatry

Maria D. Llorente, M.D.

#### Council on Healthcare Systems and Financing

Robert L. Trestman, M.D., Ph.D.

*Integrated Care*

Benjamin G. Druss, M.D.

*RBRVS, Codes and Reimbursement*

Jeremy S. Musher, M.D.

*Reimbursement for Psychiatric Care*

Brian Hepburn, M.D.

*Telepsychiatry*

Shabana Khan, M.D.

#### Council on International Psychiatry and Global Health

Pamela Collins, M.D., M.P.H.

#### Council on Medical Education and Lifelong Learning

Art Walaszek, M.D.

*Innovation*

Steven Chan, M.D., M.B.A.

*Scientific Program*

Eric Williams, M.D.

*Scientific Program—Mental Health Services Conference*

*(Oct. to Oct. tenure)*

John Santopietro, M.D.

*Vestermark Award Committee*

Donna M. Sudak, M.D.

*Well-being and Burnout*

Uchenna Okoye, M.D., M.P.H.

#### Council on Minority Mental Health and Health Disparities

Walter Wilson, Jr., M.D.

#### Council on Psychiatry and Law

Richard Martinez, M.D., M.H.

*Judicial Action*

Reena Kapoor, M.D.

#### Council on Quality Care

Carol L. Alter, M.D.

*Mental Health Information Technology*

John Torous, M.D.

*Quality and Performance Measurement*

David S. Kroll, M.D.

*Practice Guidelines*

Daniel J. Anzia, M.D.

#### Council on Research

Jonathan E. Alpert, M.D., Ph.D.

*Climate Change and Mental Health*

Elizabeth Haase, M.D.

*Psychiatric Dimensions of Disasters*

Joshua C. Morganstein, M.D.

# Go Online

Visit [ajp.psychiatryonline.org](http://ajp.psychiatryonline.org) for these features!

## AJP in Advance

*Discover the latest research advances before they appear in print*

### **Schizophrenia Imaging Signatures and Their Associations With Cognition, Psychopathology, and Genetics in the General Population**

There is a pressing need for precise quantitative imaging phenotypes that assist in early detection of risk factors for psychosis. Multivariate machine learning methods in two large data sets demonstrated the neuroanatomical dimensional signatures of schizophrenia in population-based samples and showed their associations with psychosis symptoms, cognition, and genetic risk.

## AJP Audio Podcast

The August 2022 episode of the AJP Audio podcast features Mark D. Shen, Ph.D., discussing "Subcortical Brain Development in Autism and Fragile X Syndrome: Evidence for Dynamic, Age- and Disorder-Specific Trajectories in Infancy" (p. 562).

## AJP CME

*Earn CME credit: 3 courses per issue*

You can earn CME credits by reading articles in *The American Journal of Psychiatry*. Three articles in this issue form a short course that consists of reading the article and answering three multiple-choice questions with a single correct answer for up to 1 AMA PRA Category 1 Credit™ each. Credit is issued only to subscribers of the online AJP CME Course Program.

See the list below for articles in this month's issue that are the subject of a CME quiz.

### **In this issue**

---

Evaluation of Antipsychotic Reduction Efforts in Patients With Dementia in Veterans Health Administration Nursing Homes (Gerlach et al., p. 544)

---

Subcortical Brain Development in Autism and Fragile X Syndrome: Evidence for Dynamic, Age- and Disorder-Specific Trajectories in Infancy (Shen et al., p. 562)

---

Infant Visual Brain Development and Inherited Genetic Liability in Autism (Girault et al., p. 573)

---

@APAPubJournals

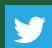

Psychiatry Online

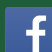

AMERICAN  
PSYCHIATRIC  
ASSOCIATION  
PUBLISHING

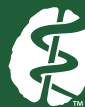

[www.appi.org](http://www.appi.org)  
1-800-368-5777  
[appi@psych.org](mailto:appi@psych.org)
